# Supplementary material
Source: PubMed Central journal article supplement (PMC4529054)
Supplement: Supp_Figure2.pdf [file Supp_Figure2.pdf]

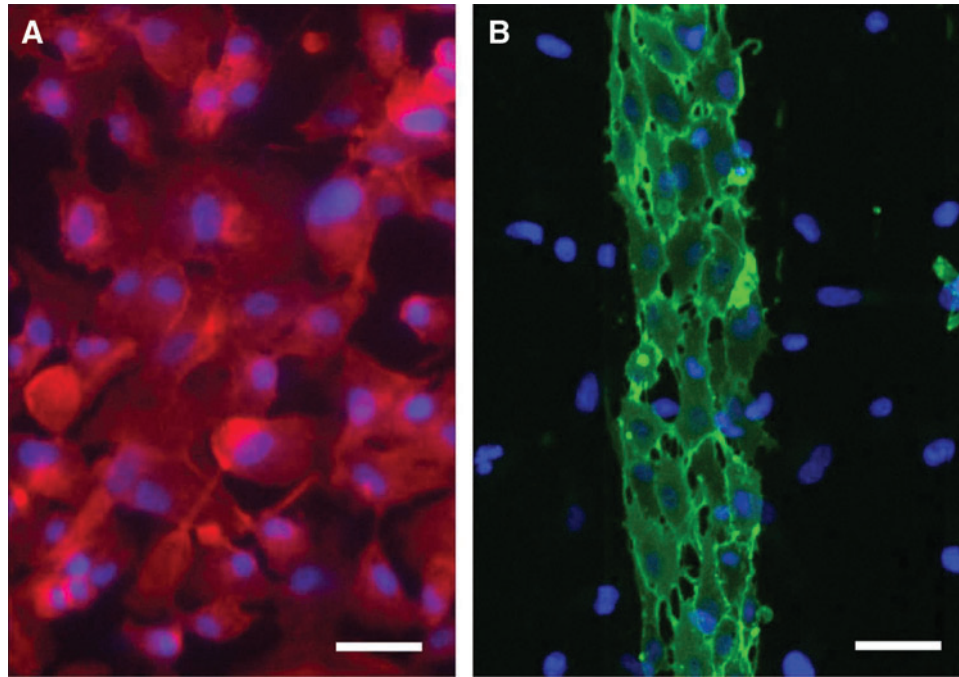

**SUPPLEMENTARY FIG. S2.** (A) A549 cells forming nearly confluent layer on the parenchymal side of the collagen membrane. *Red*, F-Actin (stained by Alexa Fluor 568 Phalloidin); *Blue*, Nuclei (Hoechst). Scale bar: 50  $\mu\text{m}$ . (B) HUVECs adhered to collagen membrane after device has been subjected to media flow at 0.5 mL/min for 3 h. *Green*, CD31; Nuclei (Hoechst). Scale bar: 50  $\mu\text{m}$ .
